# Supplementary material for: Jet-paddling jellies: swimming performance in the Rhizostomeae jellyfishCatostylus mosaicus(Quoy and Gaimard, 1824)
Source: Oxford University Press journal article supplement (doi:10.1242/jeb.191148), 2018-01-01
Supplement: jeb191148supp.pdf [file jeb191148supp.pdf]

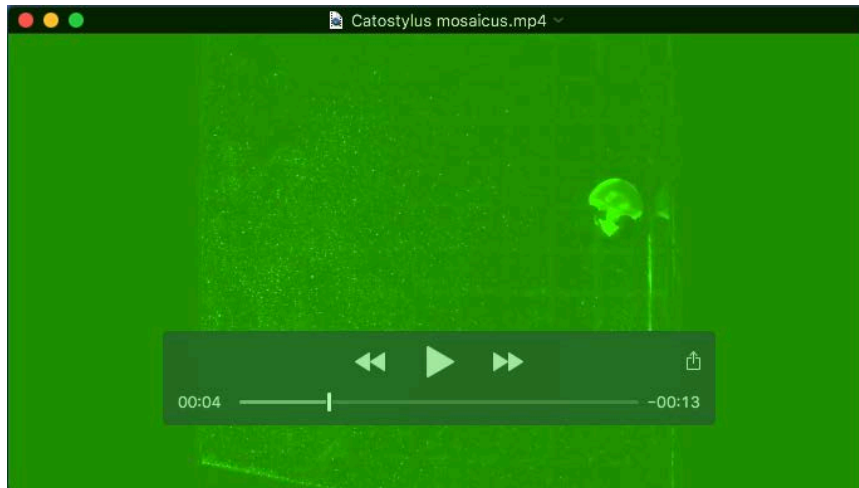

## Move 1

Part 1. An individual *Catostylus mosaicus* moves through a sheet of illuminated particles, disturbing them with its flexible body as it swims.

Part 2. Vorticity analysis of the wake of a swimming *Catostylus mosaicus*, showing the sequential shedding of counter-rotating vortices from one side of the animal.
